# Supplementary material for: A novel label-free biosensor based on self-assembled aptamer/GO architecture for sensitive detection of biomolecules
Source: Royal Society of Chemistry journal article supplement (doi:10.1039/c5ay01108f), 2015-01-01

## **Electronic Supplementary Information**

### **A novel label-free biosensor based on self-assemble aptamer/GO architecture for sensitive detecting of biomolecules**

Zhimei Huang, Jia Ge, Lan Liu, Jianhui Jiang\*, Guoli Shen, Ruqin Yu\*

State Key Laboratory of Chemo/Biosensing and Chemometrics, College of Chemistry  
and Chemical Engineering, Hunan University, Changsha 410082, P. R. China

\*Corresponding author  
Tel: 86-731-88822577. Fax: 86-731-88822872

E-mail address: [jianhuijiang@hnu.edu.cn](mailto:jianhuijiang@hnu.edu.cn); [rquyu@hnu.edu.cn](mailto:rquyu@hnu.edu.cn).

**Table S1.** Sequences of DNA oligonucleotides

---

| Name                           | Sequences (5'-3')                                                                               |
|--------------------------------|-------------------------------------------------------------------------------------------------|
| Thrombin aptamer<br>probe (P1) | CTAACCGTAAGGGTTAGGGTTAGGGTTAGGGAGT<br>CCGTGGTAGGGCAGGTTGGGGTGACTTACGGTTA<br>G                   |
| AMP aptamer probe<br>(P2)      | GGGTAGGGCGGGTTGGGAACCTTCCTGGGGGAGT<br>ATTGCGGAGGAAGGTTCCC<br>GGGTTGGGCGGGATGGGCTAAGTAAATCTACGAA |
| Control probe(P3)              | TTCATCAGGGCTAAAGAGTGCAGAGTTACTTAGC<br>CC                                                        |

---

**Fig. S1.** AFM image and associated height profile of GO nanosheets.

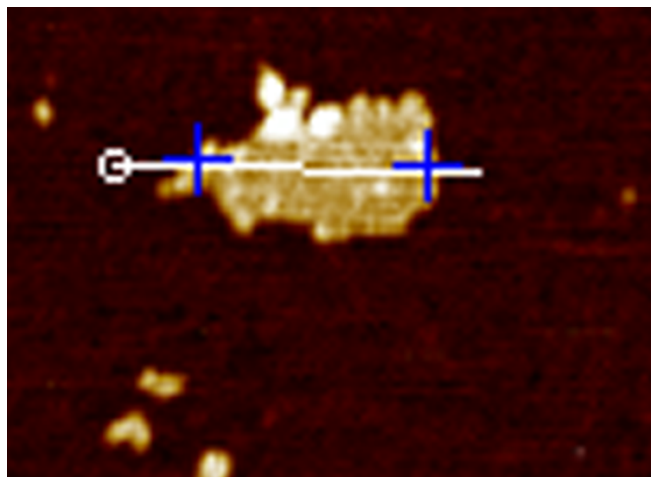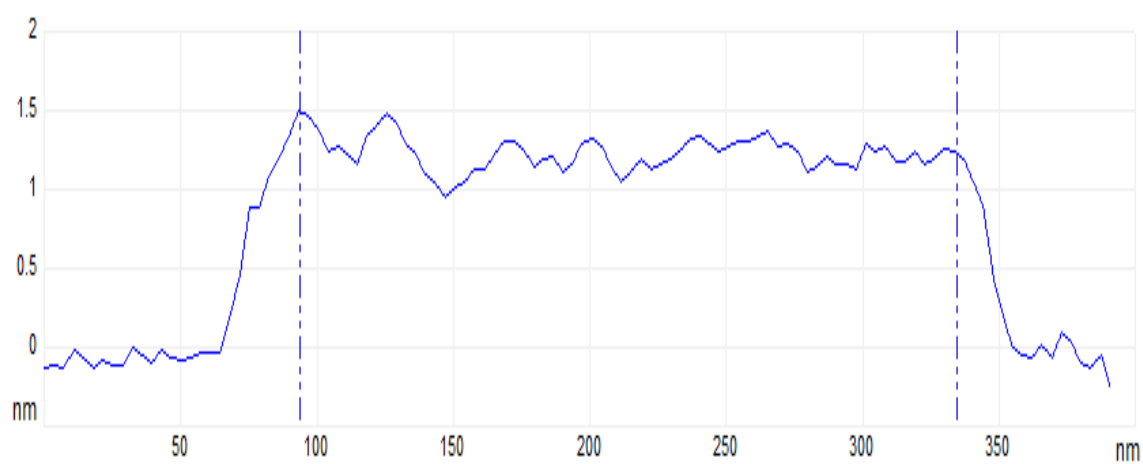

**Fig. S2.** Selectivity of the proposed aptamer/GO-based platform for thrombin detection. The concentrations of the analytes were 100 nM. Blank correspond to fluorescence intensity of the background signal (P1 100 nM, GO 10  $\mu\text{g mL}^{-1}$ , ThT 2  $\mu\text{M}$  ).

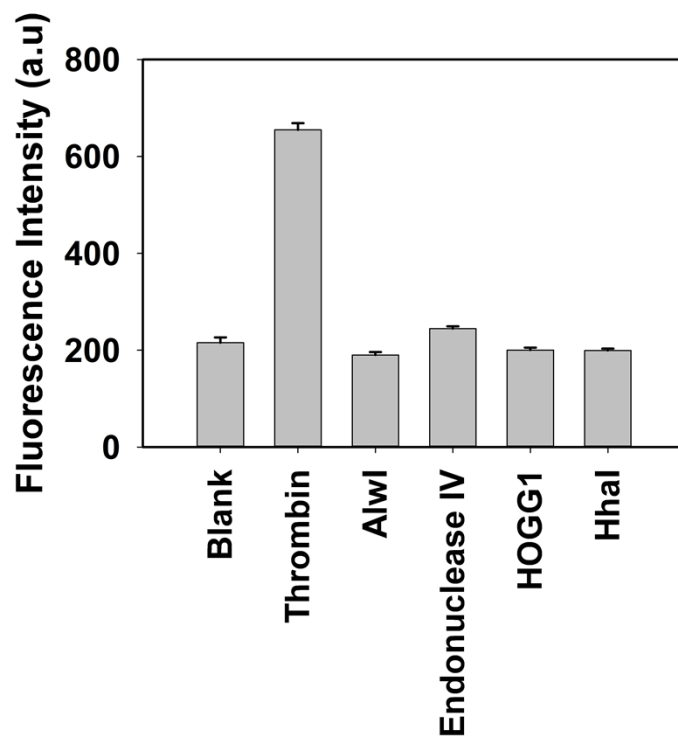

**Fig. S3.** Fluorescence emission spectra of P2 under different conditions: (a) P2 + GO + ThT + AMP; (b) P2 + GO + ThT (GO 10  $\mu\text{g mL}^{-1}$ , ThT 2  $\mu\text{M}$ , P2 100 nM, AMP 5 mM).

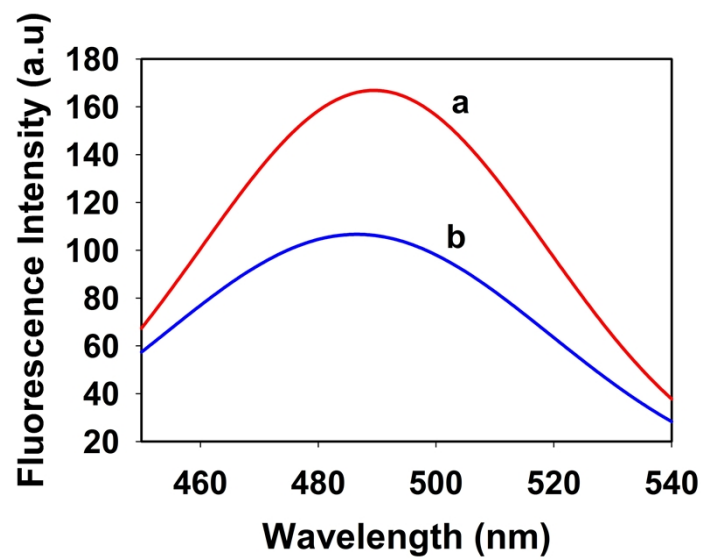

**Fig. S4.** Fluorescence intensity histogram of P2 + GO + ThT (black) and P2 + GO + ThT+ AMP (gray) in the presence of 0.2, 0.4, 1, 2 and 4  $\mu\text{M}$  ThT (P2 100 nM, GO 4  $\mu\text{g mL}^{-1}$ , AMP 5 mM).

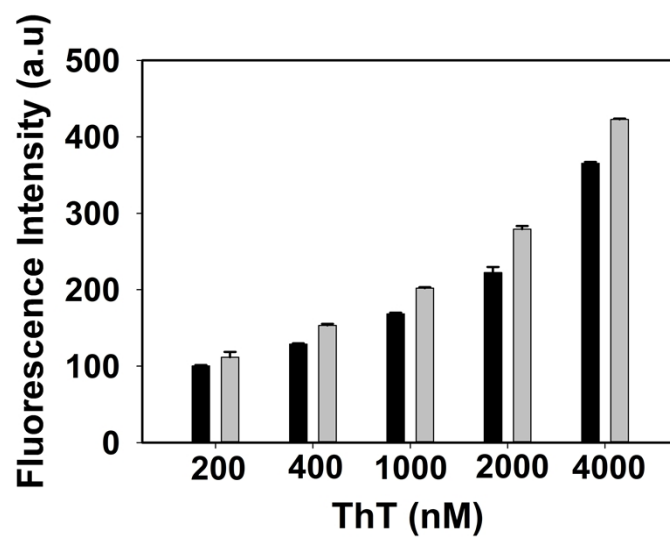

**Fig. S5.** Fluorescence intensity histogram of P2 + GO + ThT (black) and P2 + GO + ThT+ AMP (gray) in the presence of 1, 2, 4, 8, 10 and 15  $\mu\text{g mL}^{-1}$  GO (P2 100 nM, ThT 2  $\mu\text{M}$ , AMP 5 mM).

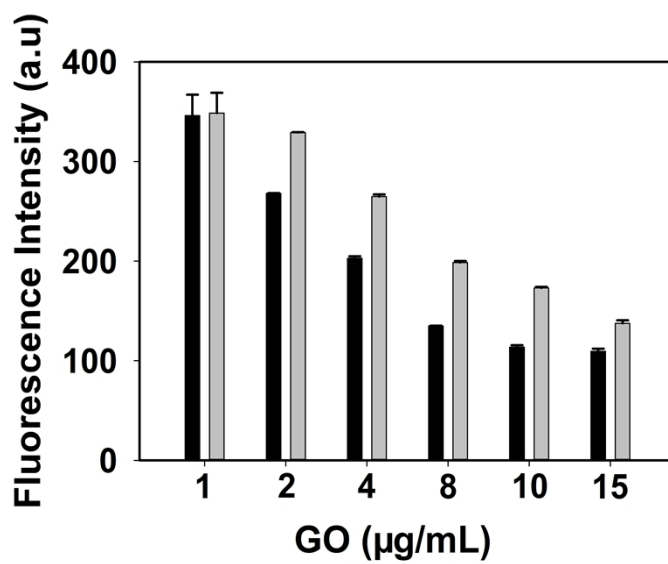

**Fig. S6.** Selectivity of the proposed aptamer/GO-based platform for AMP detection.

The concentrations of the analytes were 5 mM. Blank correspond to fluorescence intensity of the background signal (P2 100 nM, GO 10  $\mu\text{g mL}^{-1}$ , ThT 2  $\mu\text{M}$  ).

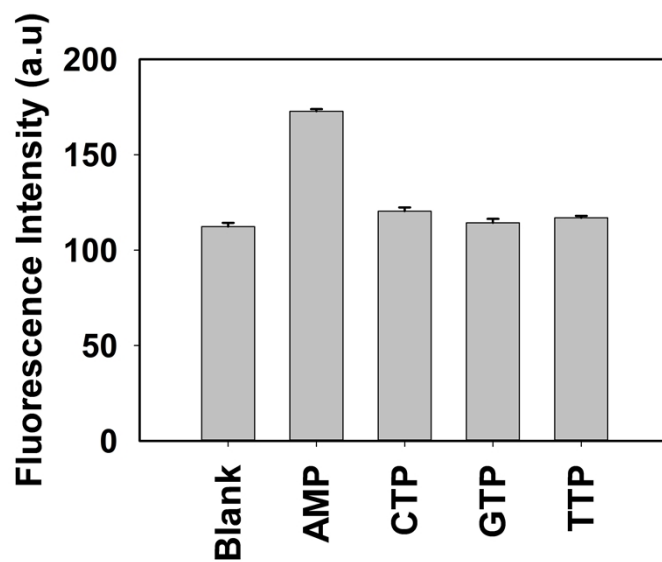

Supplement: c5ay01108f1.pdf [file c5ay01108f1.pdf]
